# Supplementary material for: Predictive value of three Inflammation-based Glasgow Prognostic Scores for major cardiovascular adverse events in patients with acute myocardial infarction during hospitalization: a retrospective study
Source: PeerJ. 2020 Apr 24;8:e9068. doi: 10.7717/peerj.9068 (PMC7185027; doi:10.7717/peerj.9068)
Supplement: Supplemental Information 1 [file peerj-08-9068-s001.xlsx]

## Sheet: Sheet1
Serial number	Hospitalization number	Gender （male:1,female:0）	Age	ST segment down	MACE	All-cause mortality （death:1, alive:0）	GPS	MGPS	HS_MGPS	GRACE score	HTI-GPS (Yes:1,NO:0)	Hypertension	Diabetics	Hemoglobin	Platelet	D-dimer	ALT	CK	CK-MB	Albumin	HS-CRP	LDL	Creatinine	BNP	TNI	Heart rate	SBP	DBP	EF(Simpson)	EF(M)	Killip classification	PCI type (PPCI:1,EPCI:2, Non-PCI:0)
1	467158	1	83	Yes	Deterioration of heart failure	0	2	2	2	120	1	1	1	111	205	6.56	36	208	27.5	34.3	23.56	1.52	159	2633	0.59	56	190	90			4	0
2	470493	1	58	No	No，Short ventricular tachycardia	0	0	0	1	93	0	0	0	127	212	0.18	87	3434	390.6	36.8	3.76	3.27	69		100	65	148	82			2	1
3	472131	0	82	No	No，Ventricular aneurysm	0	0	0	1	165	0	1	0	112	226	0.69	19	241	20.9	37.7	7.79	2.3	109	1440	15.96	100	121	76	0.37	0.46	2	2
4	473660	1	86	No	All-cause mortality	1	0	0	1	127	0	1	1	136	204	4.02	17	188	18.7	39.1	4.43	3.39	105	42	84.55	68	157	72			4	0
5	474213	0	82	No	No	0	0	0	1	143	0	1	1	132	60	0.68	28	1297	114.6	43	3.69	4.04	56	508	12.99	64	144	80			2	1
6	476278	1	62	No	Cardiogenic shock	0	1	1	1	94	0	1	1	164	212	0.95	133	5127	227	47.2	21.2	6	71	187	100	62	140	84			4	1
7	475573	1	60	No	Cardiogenic shock	0	0	0	1	110	0	0	1	121	190	0.31	22	124	13.7	36.6	6.08	1.57	80	532	2.51	84	122	93	0.29	0.384	4	2
8	476306	0	84	No	Cardiogenic syncope	0	1	0	2	138	0	1	0	110	186	1.84	19	373	33.6	31	7.26	2.69	96	154	4.61	78	188	97			2	1
9	477806	1	60	No	No	0	0	0	1	105	0	1	0	11	257	0.37	46	2131	207.1	42.1	5.04	2.84	104	331	63.63	88	161	101			2	1
10	477807	0	74	Yes	Cardiogenic shock	0	1	1	1	183	1	0	0	80	236	1.8	12	624	83.2	35	62.36	2.35	527	4858	26.78	120	131	69	0.37	0.6	2	0
11	478442	1	52	No	No	0	0	0	0	112	0	1	0	124	247	0.21	45	2565	215.9	43.3	2.58	3	69	28	25.72	68	106	77			2	1
12	478290	1	53	No	No	0	0	0	1	101	0	1	0	144	183	0.26	118	609	57.9	39.3	6.12	3.21	84	50	1.02	78	117	76			1	1
13	479114	1	41	No	No	0	0	0	0	67	0	1	0	150	209	0.23	85	3109	362.7	43.6	2.78	3.78	68	111	100	66	129	90			1	1
14	477732	1	65	Yes	Deterioration of heart failure	0	1	0	2	119	1	1	1	51	125	1.17	42	1686	254.1	32.2	5.47	2.16	110	633	90.98	110	150	66			4	0
15	482211	1	31	No	Ventricular fibrillation	0	0	0	1	103	0	0	0	138	263	0.35	153	1492	251.7	41.4	5.29	3.22	80	69	100	111	108	74	0.568	0.6	2	1
16	482836	1	77	No	All-cause mortality	1	0	0	1	152	1	1	1	141	255	0.52	79	4196	313.8	35.9	4.74	3.42	98	190	100	104	128	91			2	1
17	483500	1	56	No	No	0	0	0	0	92	0	0	1	129	151	0.41	42	651	77.3	39.7	1.2	2.41	60	29.3	58.19	68	104	67			1	1
18	484311	1	78	No	Deterioration of heart failure	0	1	1	1	135	1	1	1	89	69	0.65	156	1162	22.6	35.4	230.53	1.9	210	1406	9.37	64	130	62			4	0
19	486933	0	84	No	All-cause mortality	1	0	0	0	181	0	1	1	112	120	0.93	74	2694	443.8	37.3	2.53	4.64	87	905	100	72	91	54			2	1
20	489546	1	86	No	All-cause mortality	0	1	0	2	119	0	1	1	135	136	0.78	35	640	30.3	33.5	5.87	3.21	89	204	4.34	80	186	81			3	1
21	492231	0	73	No	No	0	0	0	1	149	0	0	0	147	234	0.74	14	504	51.8	38.1	3.85	2.99	51	130	4.96	92	124	81			2	1
22	492027	1	31	No	No	0	0	0	0	82	0	0	0	133	301	0.6	35	149	13.4	43	1.61	1.84	82	11	78.57	62	102	57			2	1
23	495195	1	55	No	No	0	2	2	2	122	0	1	1	148	229	0.32	53	1661	154.8	34.9	111.91	3.58	54	280	22.05	62	86	58			2	1
24	495369	1	70	No	No，Ventricular aneurysm	0	0	0	0	158	0	0	1	159	132	0.7	164	3406	219.2	42.1	0.39	2.86	110	178	80	86	102	70	0.41	0.596	2	1
25	496086	0	96	No	No	0	0	0	1	158	1	1	0	110	144	0.46	41	1533	149.1	38.9	7.99	2.08	107	828	36.1	59	140	68			2	0
26	498982	1	62	No	No	0	0	0	1	109	0	0	0	164	223	2.06	37	1076	94.9	36.9	3.57	2.44	70	223	14.94	66	105	62			1	1
27	503451	1	64	Yes	No	0	1	1	1	146	1	0	1	120	150	0.58	29	588	41.9	35	120.34	2.78	134	1100	19.74	64	83	56			2	0
28	502326	1	33	No	Cardiogenic shock	0	1	1	1	100	1	0	0	153	220	7.07	122	2351	269.2	35.9	99.59	2.27	174	11.9	80	124	83	42			4	1
29	503679	0	63	No	No	0	1	1	1	96	0	1	1	122	176	1.03	44	1312	152.7	39	74.9	2.97	63	488	38.45	79	145	103			1	1
30	503859	1	77	Yes	No	0	0	0	1	151	0	1	0	84	225	0.9	23	181	24.7	38.4	4.85	2.29	299	1382	3.51	84	150	72	0.51	0.55	2	1
31	503914	0	64	No	No	0	0	0	0	162	1	1	0	109	217	0.32	36	1546	202.1	36.5	2.91	2.86	232	38	62.52	76	90	60			2	1
32	506245	1	66	No	No	0	0	0	1	129	0	0	0	133	191	0.29	33	2304	155.3	37.8	5.02	3.05	73	53	24.49	88	131	85			2	1
33	509993	1	82	No	Sustained ventricular tachycardia	0	1	1	1	155	0	1	0	124	145	3.77	59	1981	280.7	35.5	53.87	2.58	106		37.85	71	144	78			2	1
34	510453	1	42	Yes	No	0	0	0	1	71	0	1	0	127	153	0.18	38	548	19.9	37.6	8.26	2.17	75	206	5.25	58	126	74			1	2
35	511615	1	47	No	No	0	0	0	0	108	0	0	0	138	237	0.21	56	3014	331.1	42.1	0.58	1.78	60	34	85	92	103	65			2	1
36	515714	1	84	Yes	All-cause mortality	1	2	2	2	196	1	1	1	95	130	3.91	21	398	28.6	31.2	14.24		181	1790	33.82	87	99	50			2	0
37	515780	1	59	No	No	0	0	0	0	109	0	0	0	140	296	0.1	35	998	112	36.9	2.59	3.5	57		14.16	74	120	80			2	1
38	517111	1	87	No	All-cause mortality	1	2	2	2	165	1	1	1	125	61	4.21	28	1348	176.1	26.6	199.21	1.99	123	697	23.55	79	136	101		0.5	2	1
39	520536	1	71	No	No	0	0	0	0	140	0	1	1	130	212	0.2	18	93	12.9	38.7	1.14	1.65	75		0.01	52	125	64			2	2
40	519027	0	87	No	All-cause mortality	1	2	2	2	130	1	1	0	97	136	42.8	10	428	57.7	34.7	12.65	2.71	659	4877	9.91	83	218	55			3	0
41	524339	1	75	No	All-cause mortality	1	0	0	1	175	0	1	0	156	184	2.09	70	3356	601.9	37.8	5.57	1.8	190	472	85	124	95	62			4	1
42	531176	1	77	No	Sustained ventricular tachycardia	0	2	2	2	157	1	1	0	184	304	4.57	108	3700	923.6	32.8	25.39	4.71	151	735	81	132	105	45			4	1
43	536070	1	66	Yes	No	0	0	0	1	136	1	1	0	161	241	0.19	63	1852	264.2	39.7	3.52	3.42	71	369	41.47	98	138	93			2	1
44	538392	1	78	Yes	All-cause mortality	1	0	0	1	152	0	0	0	153	274	0.77	86	3141	527.5	38.7	9.71	6.97	101	65	81	122	102	59			3	1
45	538652	1	64	No	No	0	0	0	1	148	0	0	0	163	226	0.19	31	3202	354	40.7	6.12	2.23	98	214	81	86	98	62			2	1
46	539434	1	62	No	No	0	1	1	1	196	0	0	0	143	153	0.32	50	256	91.3	36.1	10.87	1.85	63	597	22.32	80	125	88			1	1
47	539173	1	63	No	No	0	1	0	2	137	1	1	1	147	268	0.51	10	167	10.9	34.8	8.12	3.29	113	1133	8.55	130	115	70			3	2
48	540282	1	39	Yes	No	0	1	1	1	53	0	1	0	148	222	0.24	78	1355	136.9	37.2	22.36	4.39	61	71	13.26	82	170	110			2	1
49	541967	0	82	Yes	No	0	1	1	1	130	1	1	1	140	312	0.33	19	88	13.5	37.9	20.8	3.54	51		3.17	78	154	74			1	1
50	541103	1	86	No	All-cause mortality	1	2	2	2	142	1	0	0	116	171	2.04	12	405	29.7	38.4	167.73	2.87	94	444	1.39	80	123	75		0.55	1	0
51	547140	1	80	No	Deterioration of heart failure	0	2	2	2	133	1	1	1	95	158	0.44	19	491	15.5	34.3	23.54	2.71	210	915	15.33	78	164	64			4	0
52	547146	1	74	No	No	0	0	0	0	138	1	1	1	78	154	1.14	41	637	59.2	36.4	2.95	1.33	439	659	4.91	85	150	63			4	1
53	549007	1	48	No	No	0	1	0	2	111	0	1	1	120	149	1.33	57	1450	132.3	33.1	8.26	3.48	98	263	85	98	103	70			2	1
54	548885	1	74	Yes	All-cause mortality	1	2	2	2	176	1	0	1	117	275	2.2	575	634	73.9	26.6	126.38	2.96	203	1983	11.1	134	125	91		0.3	2	0
55	549486	0	79	No	Cardiogenic shock	0	1	1	1	177	0	0	1	121	201	1.5	16	110	15.6	35.5	61.46	3.99	59	1467	1.78	110	95	72			2	1
56	550946	1	89	No	No	0	1	1	1	174	0	1	0	155	239	0.41	90	1785	187.1	36.3	11.1	3.35	65	242	18.55	112	137	96	0.49	0.48	2	1
57	550982	0	62	Yes	Deterioration of heart failure	0	2	2	2	140	0	1	1	78	177	0.69	50	1946	214	27.3	51.43	4.68	319	2237	100	107	148	81	0.46	0.56	2	1
58	550969	1	56	Yes	Deterioration of heart failure	0	2	2	2	140	0	1	1	86	213	4.14	33	1001	99.5	30.4	17.22	2.88	453	2904	5.1	107	134	79	0.6		2	0
59	552009	0	88	Yes	No	0	2	2	2	153	1	1	1	141	166	0.86	12	176	84.3	31.8	167.88	2.8	80	581	4.74	75	159	75	0.47	0.47	2	1
60	552851	1	52	No	No	0	0	0	1	112	0	1	0	132	214	0.18	62	398	55.5	40	7.32	3.12	76	121	1.66	75	125	68		0.64	2	1
61	554025	1	49	No	No	0	0	0	1	76	0	1	0	132	326	0.21	60	305	37.3	37	9.91	2.64	59	39	0.82	52	115	72		0.64	1	1
62	554090	0	73	Yes	No	0	2	2	2	153	1	0	1	105	387	0.68	12	61	12.6	31.1	38.19	2.97	147	2880.9	2.01	74	86	52			3	2
63	555498	0	65	Yes	No	0	1	1	1	13	1	1	0	109	212	1.47	55	213	30.2	36.5	60.67	3.41	115	299.9	3.88	84	121	69			2	0
64	557841	1	74	Yes	No	0	2	2	2	128	1	1	1	107	278	0.83	42	505	49.2	31.4	21.76	1.99	77	2204	13.71	78	132	65		0.65	3	1
65	558431	1	77	Yes	No	0	2	2	2	124	1	1	0	98	301	5.85	1126	301	37.3	31.6	105.02	1.71	128	4056	0.36	58	135	41		0.64	1	0
66	559243	1	78	Yes	No	0	2	2	2	186	1	1	0	94	123	19.03	673	26	9	30.9	71.06	2	282	4959	1.4	90	95	56			2	0
67	559886	1	49	Yes	No	0	0	0	1	88	1	1	1	118	251	0.42	6	142	42.6	39.2	3.69	3.46	1018	90	0.88	72	149	91		0.62	1	1
68	560913	1	66	Yes	No	0	0	0	1	94	0	1	1	168	180	0.64	14	270	298	37.8	6.86	3.17	105	118	2.91	64	145	68		0.67	1	1
69	563270	0	82	Yes	Cardiogenic shock	0	1	1	1	127	1	0	0	131	202	0.26	35	1320	311	35.3	41.97	2.75	33		26.87	62	175	67			2	0
70	564435	1	87	No	Cardiogenic shock	0	1	1	1	182	1	0	0	101	195	1	71	2732	186	35.3	111.9	3.04	268	363.2	78	100	99	65		0.54	4	1
71	565067	1	74	Yes	Cardiogenic shock	0	2	2	2	125	1	1	1	85	200	0.61	27	499	67.2	30.9	22.35	1.63	544	1145	5.69	72	167	80		0.617	4	1
72	566022	0	77	Yes	Cardiogenic shock	0	2	2	2	143	1	1	1	83	239	4.54	123	336	50.9	32.2	36.76	4.64	87	2250	6.08	92	116	70			4	0
73	566088	1	78	No	Sustained ventricular tachycardia	0	2	2	2	182	1	0	1	87	94	10.19	10	277	20.6	25.1	92.56	3.98	552	4295	1.06	96	114	58			2	1
74	567147	1	39	No	No	0	0	0	0	56	0	1	0	141	145	0.4	86	7715	602.2	42.5	1.89	2.97	61	187	78	76	120	72		0.66	1	1
75	567653	1	43	Yes	No	0	0	0	1	67	0	1	0	143	269	0.16	26	160	21.2	41.8	3.07	3.79	83	19	3.33	78	157	94		0.66	1	2
76	567819	0	89	Yes	Cardiogenic shock	0	2	2	2	139	1	1	1	99	138	3.84	31	588	94.3	33.8	41.94	2.15	23	216.3	13.25	92	164	72			2	0
77	568342	0	74	No	No	0	1	1	1	161	1	1	1	88	164	2.44	13	389	43.2	35	59.34	3.77	373	2324	13.58	64	128	69		0.61	2	0
78	570096	1	80	No	No	0	0	0	1	138	0	1	0	148	209	0.42	49	1674	204.6	37.5	7.89	2.93	85	401	48.73	70	160	80		0.57	2	1
79	570668	1	44	No	No	0	0	0	0	115	0	0	0	152	318	0.37	42	5820	583	40.2	2.92	3.14	80	109.5	102	88	95	72		0.62	2	1
80	571225	1	83	No	No	0	0	0	0	165	0	1	1	126	109	0.88	73	3376	266.9	38.1	1.51	1.85	89	826.6	78	62	110	60			2	1
81	571330	1	67	Yes	No	0	1	0	2	130	1	0	0	105	90	2.89	61	882	99.3	32.8	6.68	1.99	49		3.35	52	107	75			2	1
82	571764	1	81	Yes	Deterioration of heart failure	0	2	2	2	142	1	1	1	74	212	3.17	31	59	7.8	28.9	33.7	2.02	307	649	0.15	56	149	60		0.655	3	0
83	571770	1	65	Yes	No	0	1	1	1	132	0	1	0	144	154	0.55	28	62	15.4	36.2	34.24	2.38	111	110.5	1.99	87	97	72		0.7	1	2
84	571892	0	87	Yes	Cardiogenic shock	0	2	2	2	166	0	1	0	100	186	0.7	21	659	57.9	28.4	105.12	3.07	59	473	29.85	90	128	77			2	0
85	572449	0	70	Yes	No	0	1	1	1	141	1	1	1	129	267	0.16	35	135	58	38.1	140.22	4.03	90	591	8.82	68	120	72			2	2
86	572555	0	80	Yes	No	0	1	0	2	190	1	1	0	115	170	0.61	14	463	41.3	33.2	5.69	3.18	299	153.1	15.48	53	97	62		0.76	2	2
87	576842	1	81	No	Cardiogenic shock	0	2	2	2	189	1	1	1	135	143	8.28	36	1361	101.4	30.8	143.58	2.56	955	119	55.95	102	96	58			4	0
88	577553	1	85	No	All-cause mortality	1	1	0	0	134	0	0	1	118	197	1.62	34	84	29.5	41.2	11.03	2.74	46	276	1.26	66	130	66			3	0
89	578195	1	69	Yes	No	0	2	2	2	130	1	1	0	103	131	3.4	22	331	42.5	32.8	24.76	2.46	103	494	14.4	72	133	78		0.71	2	0
90	580164	1	82	No	Cardiogenic shock	0	2	2	2	142	1	0	1	156	79	1.84	152	2645	359.6	33.3	163.57	3.48	112	460	72.05	109	159	67	0.36	0.47	4	1
91	582836	0	86	Yes	No	0	1	1	1	124	0	0	0	134	181	0.38	38	1217	142.6	38	10.81	3.38	46	95.2	13.07	69	147	84			1	1
92	583078	1	63	Yes	No	0	1	1	1	103	0	1	0	163	240	2.8	26	1439	160	35.9	161.53	2.28	64	17	23.09	85	160	100		0.67	2	1
93	583252	1	86	No	Cardiogenic shock	0	2	2	2	148	1	1	1	131	102	1	17	360	65.6	31.6	60.21	3.25	74	4231	4.61	116	155	75		0.622	4	2
94	583984	1	39	No	No	0	0	0	1	94	0	0	0	141	241	0.29	64	2376	360	38	5.38	2.31	76	24	73.8	90	105	71		0.59	2	1
95	584331	1	35	No	No	0	0	0	0	59	0	0	0	156	246	0.22	60	1492	204	41	1.83	2.78	54	14.3	19.41	68	107	74		0.594	1	1
96	584970	1	58	Yes	Cardiogenic shock	0	2	2	2	110	1	0	1	79	223	0.93	18	1265	167.3	31.8	28.21	1.75	517	3681.1	2.52	74	178	76		0.63	2	1
97	585617	0	67	Yes	Deterioration of heart failure	0	2	2	2	157	1	1	1	118	198	0.62	14	121	29.3	31.1	14.55	2.61	857	293.9	1.58	92	124	82		0.49	2	1
98	586314	0	62	Yes	No	0	0	0	0	117	0	1	0	126	145	0.14	12	152	20.5	39.7	0.9	2.97	53		1.08	76	143	89		0.56	2	1
99	586480	1	72	Yes	No	0	0	0	1	143	0	1	0	118	235	0.56	33	263	58.3	36.9	3.66	3	73	50.7	5.94	102	155	79		0.62	2	1
100	586858	0	72	Yes	Cardiogenic shock	0	1	1	1	140	0	1	1	101	190	3.13	1559	1045	100	36.3	19.76	1.65	169	3427.5	34.36	108	129	93		0.41	4	1
101	586983	1	72	No	No	0	0	0	1	124	0	0	1	148	97	0.09	42	1264	156.3	38	3.91	2.12	85	228	14.01	80	160	94		0.71	1	1
102	589766	1	56	Yes	No	0	0	0	1	93	0	1	0	138	161	0.11	26	161	15.6	38.2	3.78	2.65	102	6.7	1.97	77	134	90		0.74	1	1
103	590425	0	72	Yes	All-cause mortality	1	1	0	2	151	0	1	1	117	308	3.33	19	223	33.3	33.1	3.94	3.44	296	2187	1.17	84	101	50			4	1
104	590527	1	34	Yes	No	0	0	0	1	86	0	1	1	157	264	0.24	43	2211	281.3	41.8	5.31	3.58	61	84	27	76	108	60		0.66	2	1
105	590710	1	62	Yes	Deterioration of heart failure	0	2	2	2	121	1	1	1	99	263	1.46	33	1057	29.3	22.9	52.27	5.26	452	708.8	1.73	89	154	80			1	1
106	590975	1	69	No	No	0	0	0	1	116	0	1	0	161	282	0.23	24	1079	118.7	36.5	4.22	2.19	69	289.8	6.55	72	142	60		0.58	2	1
107	591364	0	79	Yes	All-cause mortality	1	2	2	2	155	1	0	0	93	72	16.92	922	649	100.1	27.1	20.2	1.47	383	4989	2.55	98	127	67			3	0
108	591365	1	67	Yes	No	0	0	0	0	97	0	1	0	137	223	0.15	22	269	36.6	36.6	0.53	3.15	63	16	2.37	70	143	75			1	1
109	592409	1	44	Yes	No	0	0	0	1	100	0	0	1	150	235	0.16	94	3671	280	41	5.17	3.51	55	25	30.81	91	120	83		0.58	2	1
110	593481	1	85	No	Cardiogenic shock	0	2	2	2	175	0	1	0	121	89	3.09	1275	2714	198.6	30.6	95.44	2.73	197	550	100	68	74	48		0.592	4	1
111	594391	1	70	No	All-cause mortality	1	2	2	2	141	1	1	0	127	390	1.03	74	348	33.8	30.8	194.67	5.18	181	4494.8	13.75	72	128	77		0.4	3	1
112	10598133	1	71	No	No	0	0	0	1	116	0	1	0	163	238	0.25	26	747	52.5	40.2	4.97	5.3	80		9.69	73	156	93		0.58	1	1
113	10598517	0	56	Yes	No	0	1	0	2	120	1	1	0	97	275	0.47	25	1052	164.5	31.4	4.05	2.84	873	28	13.03	102	134	68		0.57	1	1
114	10598611	1	50	No	No，Ventricular aneurysm	0	0	0	1	124	0	0	0	146	204	2.43	95	4141	231.3	36	7.51	4.05	63	310	81	111	125	76	0.45	0.7	2	1
115	10600946	0	87	No	All-cause mortality	1	2	2	2	160	1	1	1	79	212	19.85	15	205	45.9	29.2	37.46	2.11	260	373	6.78	67	157	67		0.72	2	1
116	10600973	1	77	Yes	No	0	2	2	2	131	1	1	0	142	163	0.24	30	1574	149.2	31.8	31.71	2.66	72	767.4	58.28	58	151	88	0.52	0.51	2	1
117	10602175	0	73	No	Sustained ventricular tachycardia	0	1	0	2	119	0	1	0	128	122	1.16	54	895	95.6	34	4.84	3.16	64	913	35.53	82	160	91		0.57	2	1
118	10603141	1	60	No	No	0	1	1	1	122	1	1	0	132	212	0.36	126	3972	411.1	36	10.8	4.07	53	37.1	101	87	144	82			2	1
119	10603394	1	65	No	No	0	2	2	2	152	1	1	1	185	266	8.8	98	3914	806.8	34.9	210.36	5.41	282	890	83	89	108	74		0.43	2	1
120	10604033	1	50	No	No	0	0	0	1	92	0	0	0	146	248	0.1	54	323	43.6	37.5	3.3	1.79	70	2	1.08	60	113	70		0.55	1	1
121	10604036	1	55	Yes	No	0	0	0	1	113	0	1	0	147	174	0.4	80	509	70.9	41.2	4.71	4.19	57	56	5.06	60	114	63		0.69	2	1
122	10604106	1	50	No	No	0	2	2	2	115	1	1	0	129	254	0.79	51	687	27.8	32.5	182.92	3.68	79	523	21.75	52	115	72		0.59	2	1
123	10605147	1	54	No	No	0	0	0	1	89	0	1	0	150	216	0.48	26	830	103.1	38.5	5.72	3.77	52		15.72	78	120	71		0.58	1	1
124	10605530	1	77	No	No	0	1	1	1	139	0	1	1	122	491	0.69	11	154	15.4	39	64.3	1.82	114	313	2.07	78	149	70	0.67	0.57	2	1
125	10607080	1	49	Yes	No	0	0	0	1	77	0	0	0	154	228	0.14	37	619	66.5	38.7	5.49	3.6	73		13.93	78	120	72		0.713	1	1
126	10607875	1	50	No	No	0	0	0	1	71	0	1	0	135	297	0.09	35	232	16.8	38.5	6.79	2.5	67	470	2.92	96	172	100		0.69	1	1
127	10608834	1	78	Yes	All-cause mortality	1	2	2	2	162	1	1	0	114	153	4.66	10	440	22.1	28.5	215.11	1.14	146	1702	6.52	72	109	56			2	0
128	10609725	1	62	No	Cardiogenic shock	0	2	2	2	120	0	1	0	130	246	0.22	76	14884	1464.8	33.7	53.36	3.71	68	813.5	101	68	87	59		0.64	4	1
129	10610817	1	43	No	No	0	0	0	0	90	0	0	1	110	243	4.32	70	528	51.6	46.3	2.35	2.61	72	349.1	26.35	62	132	81		0.604	2	1
130	10611653	0	85	No	Cardiogenic syncope	0	2	2	2	158	1	1	0	148	199	0.15	33	1229	68.8	33.2	216.63	2.16	47	566.8	16.84	77	99	70		0.57	1	2
131	10613470	1	40	No	No	0	1	1	1	88	0	0	1	172	252		78	5792	480.1	40	20.53	4.53	59	33	99	101	113	76		0.55	1	1
132	470174	1	82	Yes	Cardiogenic syncope	0	2	2	2	144	0	1	0	149	140	0.56	20	169	24.7	33.4	23.9	2.53	102	716	20.46	80	120	68			3	0
133	471986	1	98	Yes	No	0	2	2	2	162	0	0	0	93	271	2.54	16	508	78.5	31.1	12.48	2.11	82	298	17.88	79	153	71			2	0
134	473867	0	58	Yes	No	0	0	0	1	93	0	1	1	81	138	0.66	36	240	25.3	39.4	3.58	2.49	158	1037	3.64	59	124	66		0.598	1	0
135	475318	1	40	Yes	No	0	0	0	0	74	0	0	1	152	149	0.24	21	268	22	38.4	2.82	3.14	60		5.94	86	126	78	0.49	0.54	1	2
136	490532	1	65	No	No	0	0	0	1	122	0	1	0	165	189	0.22	51	1210	85.7	40	8.5	4.51	102	642	53.75	50	91	69			1	1
137	507774	1	64	Yes	No	0	0	0	0	120	0	1	1	166	215		29	431	35.4	44	2.59	4.98	77	561	8.07	82	158	100			2	0
138	508039	0	79	Yes	No	0	0	0	1	130	0	1	0	109	192	4.39	18	156	14.2	35	3.16	2.23	48	1405	1.77	97	120	66			1	1
139	508867	1	91	No	No	0	0	0	1	141	0	1	0	120	225	0.78	32	139	37.4	35.9	5.2	2.16	100	1780	1.44	82	140	82	0.45	0.386	1	2
140	515670	1	71	No	No	0	0	0	1	161	0	1	1	126	184	0.32	52	1683	130.3	37.9	4.44	2.42	79	67	25.07	80	130	80		0.55	2	1
141	517106	0	89	Yes	Cardiogenic shock	0	2	2	2	168	1	1	1	105	226	1.89	67	1112	97.2	32.4	128.41	1.7	247	2362	30.27	48	90	52	0.39	0.51	4	0
142	520576	1	52	No	No	0	0	0	0	109	0	0	0	135	261	0.22	34	329	34.2	39.7	1.99	4.34	61		8.63	72	130	70			2	1
143	520885	1	85	Yes	All-cause mortality	1	2	2	2	157	1	1	0	80	180	2.47	14	551	36.7	26.5	90.98	2.39	103	1210	10.67	69	135	76			2	0
144	525046	1	71	Yes	No	0	0	0	0	130	1	0	0	75	116	6	9	292	36.5	37.1	2.41	4.07	491	573	16.74	93	160	91			1	1
145	528788	1	52	No	No	0	0	0	1	177	0	1	1	134	184	0.74	75	2578	540.2	39.7	9.52	2.28	77	251	81	85	104	74			2	1
146	530531	1	62	No	No	0	0	0	1	111	0	1	1	167	133	0.15	71	690	95.5	39.2	4.55	2.64	85	20	1.72	92	170	92			2	1
147	534863	1	85	Yes	No	0	0	0	0	147	0	1	0	172	145	0.94	28	60	23.7	36	2.66	2.96	78	99	0.29	60	157	71			2	0
148	543935	1	47	No	No	0	0	0	0	79	0	1	0	127	327	0.23	48	1539	141	40.8	2.77	3.61	80		33.3	64	119	83			1	1
149	544383	1	78	Yes	No	0	1	1	1	139	1	1	0	78	153	0.85	16	151	13.2	36	27.26	2.28	391	3020	2.28	80	140	82	0.44	0.455	3	2
150	551218	1	59	Yes	No	0	0	0	0	78	0	1	1	130	160	0.25	21	442	40.5	40.5	0.79	3	126		5.36	97	189	83		0.7	1	1
151	554565	0	74	Yes	No	0	0	0	1	100	0	1	0	146	248	0.24	89	152	20.6	42.2	4.7	3.98	67	52.7	1.11	75	172	78		0.68	1	2
152	557232	1	45	No	No	0	0	0	0	73	0	0	1	128	258	0.33	43	260	38.9	39.9	1.98	2.57	53		2.48	82	130	80		0.63	1	1
153	558919	1	70	Yes	No	0	0	0	0	160	0	0	0	117	118	0.29	18	100	13.8	37.4	0.5	1.77	87		0.26	67	96	64		0.5	2	1
154	570820	1	72	Yes	No	0	0	0	0	111	0	0	0	144	167	0.5	30	561	41.7	36.5	2.37	2.19	78		12.57	68	157	95		0.57	1	1
155	579480	1	85	Yes	All-cause mortality	1	2	2	2	162	1	1	0	71	219	0.62	6	33	15.8	22.7	149.82	1.28	194	2380.4	3.46	140	100	54			4	0
156	584469	1	47	No	No	0	0	0	1	43	0	1	1	148	284	0.13	33	347	31.3	42.6	4.69	4.49	56	62	1.04	57	164	108		0.62	1	1
157	549748	1	92	No	No	0	1	0	0	147	0	1	0	134	194	0.61	36	353	79.3	30	2.13	4.06	92	77	3.05	86	169	68			2	1
158	591704	1	75	Yes	Cardiogenic shock	0	1	1	1	131	1	1	1	101	206	0.36	32	153	19.7	37	135.31	3.28	801	4989	2.8	98	161	94		0.27	4	1
159	596211	1	81	No	No	0	0	0	0	133	0	1	1	150	210	0.6	32	321	30.3	39.2	2.07	1.97	63		9.38	67	128	71			1	2
160	596898	1	68	No	No	0	0	0	1	99	0	1	1	155	137	2.11	62	2717	148.3	39	8.34	3.21	71		44.08	84	149	96		0.72	1	1
161	597095	1	86	Yes	No	0	1	0	2	171	0	1	0	117	112	0.98	7	3059	175.4	32.9	5.66	2.7	257	330	100	64	127	69			2	1
162	597423	1	63	Yes	No	0	0	0	0	110	0	1	0	144	175	0.41	21	111	15.7	37.2	1.92	3.17	92		0.16	89	134	65		0.608	1	1
163	10598945	1	76	No	No, Ventricular aneurysm	0	1	1	1	145	1	1	0	98	338	10.03	89	36	13.9	37	105.15	2.96	99	1044	0.22	85	93	56	0.32		1	0
164	10607894	0	66	No	No	0	2	2	2	109	1	0	1	118	284	0.36	16	250	17.2	31.7	60.39	2.61	77		9.22	80	120	76			1	1
165	10611113	1	56	Yes	No	0	0	0	1	120	1	1	1	109	199	2.28	29	462	68	38.8	5.35	2.72	649	146	4.03	102	135	77			1	1
166	475610	1	59	Yes	No	0	0	0	1	113	0	1	0	135	268	0.35	36	329	49.4	38.1	6.28	6.79	67	298	11.1	66	105	60			2	2
167	479036	1	81	No	No	0	0	0	0	165	0	1	0	111	232	0.24	16	573	54.3	36.9	2.47	2.12	86	49	15.83	68	113	60			2	1
168	480620	1	60	Yes	No	0	0	0	0	110	0	1	0	125	217	0.28	26	276	35.1	38.5	1.71	5.65	55		2.39	54	110	70			1	1
169	484988	0	63	Yes	No	0	0	0	0	91	0	1	0	125	226	0.25	35	1360	162.1	39.8	2.13	4.15	48		28.26	60	144	65			1	1
170	519352	1	84	Yes	No	0	0	0	0	139	0	1	0	119	137	0.57	34	1270	164.5	37.5	1.11	2.8	96	19	59.58	80	180	90			2	1
171	519358	1	71	Yes	No	0	0	0	1	139	0	1	1	143	165	0.41	41	1102	102.5	36.3	6.28	2.08	127	282	24.05	70	100	64	0.52		1	1
172	520397	1	83	Yes	All-cause mortality	1	2	2	2	193	1	1	0	78	101	0.51	11	80	26.1	26.4	119.11	1.64	431		7.82	74	115	67			2	0
173	523003	0	83	No	No	0	2	2	2	135	1	1	0	122	159	0.98	82	193	35.1	29.8	183.42	1.1	67	1832	4.32	88	169	91			2	0
174	524092	1	78	No	No	0	0	0	0	128	0	1	1	140	197	0.43	57	2750	576	42.1	2.83	3.03	73	206	39.1	90	170	80			2	1
175	525290	1	91	No	No	0	0	0	0	171	0	1	1	122	137	0.39	53	3160	359.5	36.3	2.15	2.78	88	775	85	76	123	87			2	1
176	541850	0	85	No	No	0	0	0	1	164	0	1	0	127	164	1.9	20	100	18	39.9	3.02	3.24	61	1940	5.72	115	157	77			2	1
177	549567	1	75	No	No	0	0	0	0	140	0	0	0	164	229	0.26	34	489	62.8	38.5	1.86	3.1	84	57	1.87	62	129	71		0.594	2	1
178	549819	0	83	No	No	0	2	2	2	132	1	1	1	103	147	1.72	35	363	68.1	32.5	91.09	1.72	76	495	9.13	75	143	80		0.69	1	1
179	549968	1	64	Yes	Cardiac arrest	0	1	1	1	134	0	0	0	139	120	1.68	86	590	65.4	42.6	29.9	1.33	108	480	3.75	80	125	70		0.559	2	1
180	550504	1	47	No	No	0	1	1	1	63	1	0	0	155	357	0.21	49	2049	203.3	42.1	55.06	4.07	70	114	12.41	83	140	88		0.635	1	1
181	565484	1	69	No	No	0	1	1	1	109	1	1	0	148	167	0.73	95	8058	421.7	38.7	20.71	3.34	86	99.1	102	75	135	65		0.47	1	1
182	570371	1	83	Yes	Deterioration of heart failure	0	2	2	2	150	1	0	1	121	135	35.63	1465	142	19	31.6	136.65		158	4909	1.66	70	131	70		0.563	3	0
183	575996	1	57	No	No	0	0	0	1	131	0	0	0	147	310	0.13	46	831	108	36	5.42	4.18	90	171	2.98	82	82	60			2	1
184	578381	1	65	No	No	0	1	1	1	119	1	1	0	129	255	1.16	62	192	32	39.4	24.25	3.54	98	372	1.88	72	148	80		0.66	2	1
185	591429	1	66	No	No	0	2	2	2	150	1	1	1	104	194	0.47	16	370	36.9	31	11.5	1.47	798		5.42	77	120	70		0.64	2	1
186	594903	1	59	Yes	No	0	0	0	1	109	0	1	0	140	182	0.33	22	541	128.3	35.9	3.03	2.23	82	71	7.77	91	150	96		0.5	2	1
187	10601988	1	81	No	Cardiogenic syncope	0	1	1	1	162	1	1	1	120	178	1.04	64	94	13.4	37.8	171.91	3.09	77	1451.8	2.88	73	122	71		0.7	2	2
188	10610051	1	61	Yes	No	0	1	0	0	111	0	1	1	171	110	0.56	93	63	14.3	31.6	2.2	1.77	87	152	0.94	78	135	80		0.7	3	1
